# Supplementary material for: Viscoelastic Properties of Epoxidized Natural Rubber/Poly(lactic acid) PLA/ENR Blends Containing Glycidyl-POSS and Trisilanolisooctyl-POSS as Functional Additives
Source: MDPI journal article supplement (doi:10.3390/ma14102686), 2021-05-20
Supplement: s1 [file s1]

# Viscoelastic properties of epoxidized natural rubber/poly(lactic acid) PLA/ENR blends containing glycidyl-POSS and trisilanolisooctyl-POSS as functional additives.

Magdalena Lipińska<sup>1,\*</sup>, Klaudia Toczek<sup>2</sup> and Magdalena Stefaniak<sup>3</sup>

<sup>1)</sup> Lodz University of Technology, Institute of Polymer and Dye Technology;  
magdalena.lipinska@p.lodz.pl

<sup>2)</sup> Lodz University of Technology, Institute of Polymer and Dye Technology;  
klaudia.toczek@dokt.p.lodz.pl

<sup>3)</sup> Lodz University of Technology, Institute of Polymer and Dye Technology;  
magdalenastefaniak95@gmail.com

\* Correspondence: [magdalena.lipinska@p.lodz.pl](mailto:magdalena.lipinska@p.lodz.pl) ;

Supporting Information:

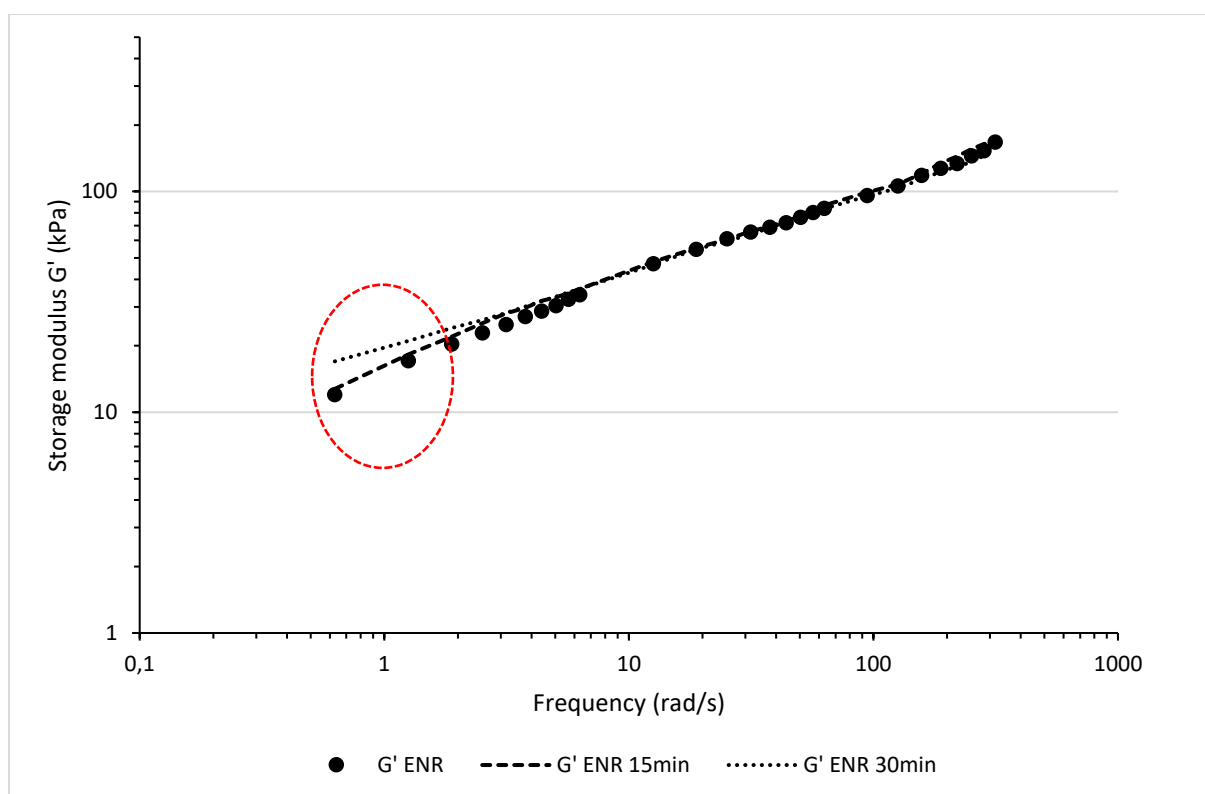

Figure S1: Influence of thermal treatment during 15 and 30 min. of compression molding at 160°C on the viscoelastic properties of neat ENR rubber, the storage shear modulus  $G'$

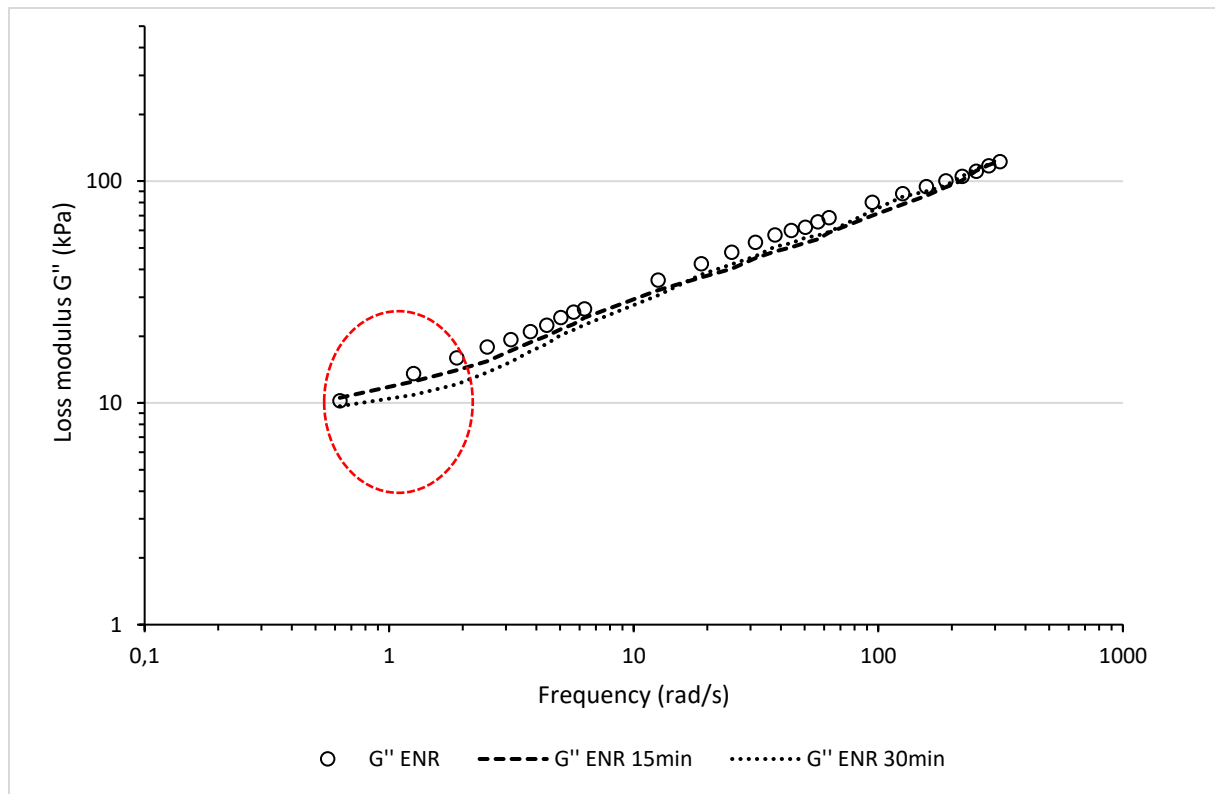

Figure S2: Influence of thermal treatment during 15 and 30 min. of compression molding at 160°C on the viscoelastic properties of neat ENR rubber, the loss shear modulus  $G''$

No significant changes in viscoelastic behavior and the values of storage shear modulus  $G'$  of neat ENR rubber due to the thermal treatment during 15 min. and 30 min. were observed for the higher frequency. The slightly higher values of the storage shear modulus  $G'$  were observed for the sample thermally treated in hydraulic press during 30 min. at low values of frequency, lower than  $1 \text{ rad}\cdot\text{s}^{-1}$ . Similarly, no significant effect of thermal treatment in hydraulic press was observed in case of loss shear modulus  $G''$  for the higher frequency. At lower frequencies (less than  $1 \text{ rad}\cdot\text{s}^{-1}$  slightly lower values of  $G''$  were indicated.
